# Supplementary material
Source: publisher site journal article supplement (http://content.karger.com/ProdukteDB/miscArchiv/000/207/517/Suppl.Material.pdf)
Supplement: Supplementary file 1 [file Suppl.Material.pdf]

Supplementary Table I. Synteny blocks (larger than 10 Mbp) between human (HSA) and ten vertebrate species (*Pan troglodytes*, *Pongo pygmaeus*, *Macaca mulatta*, *Mus musculus*, *Rattus norvegicus*, *Canis familiaris*, *Bos taurus*, *Equus caballus*, *Monodelphis domestica* and *Gallus gallus*) analyzed in this study.

| HSA<br>chr | synteny block |             |            | analyzed region     | ITS  |
|------------|---------------|-------------|------------|---------------------|------|
|            | start         | end         | length     |                     |      |
| 1          | 93.678.279    | 103.963.688 | 10.285.409 | 93750000-103750000  | none |
| 2          | 139.781.766   | 153.340.285 | 13.558.519 | 141500000-151500000 | none |
| 2          | 160.371.698   | 183.348.414 | 22.976.716 | 166800000-176800000 | none |
| 3          | 63.992.755    | 75.194.035  | 11.201.280 | 64500000-74500000   | none |
| 4          | 130.321.097   | 141.409.681 | 11.088.584 | 131000000-141000000 | none |
| 5          | 18.589.077    | 31.587.394  | 12.998.317 | 20000000-30000000   | none |
| 5          | 154.405.899   | 167.898.962 | 13.493.063 | 156000000-166000000 | none |
| 6          | 88.039.107    | 100.351.735 | 12.312.628 | 89000000-99000000   | none |
| 8          | 98.831.934    | 120.526.643 | 21.694.709 | 105000000-115000000 | none |
| 8          | 122.033.975   | 142.388.306 | 20.354.331 | 127000000-137000000 | none |
| 10         | 104.218.592   | 121.122.789 | 16.904.197 | 108000000-118000000 | none |
| 12         | 74.177.244    | 85.549.892  | 11.372.648 | 75000000-85000000   | none |
| 13         | 66.103.325    | 80.773.033  | 14.669.708 | 68500000-78500000   | none |
| 13         | 90.050.977    | 101.879.544 | 11.828.567 | 90500000-100500000  | none |
| 14         | 73.428.250    | 90.701.319  | 17.273.069 | 77000000-87000000   | none |
